# Supplementary material for: Co3O4 quantum dot decorated polypyrrole nanocomposites as a flexible, conducting, anticorrosive and antibacterial agent: sustainable experimental and theoretical approach
Source: Royal Society of Chemistry journal article supplement (doi:10.1039/d2su00104g), 2023-01-01
Supplement: d2su00104g2.pdf [file d2su00104g2.pdf]

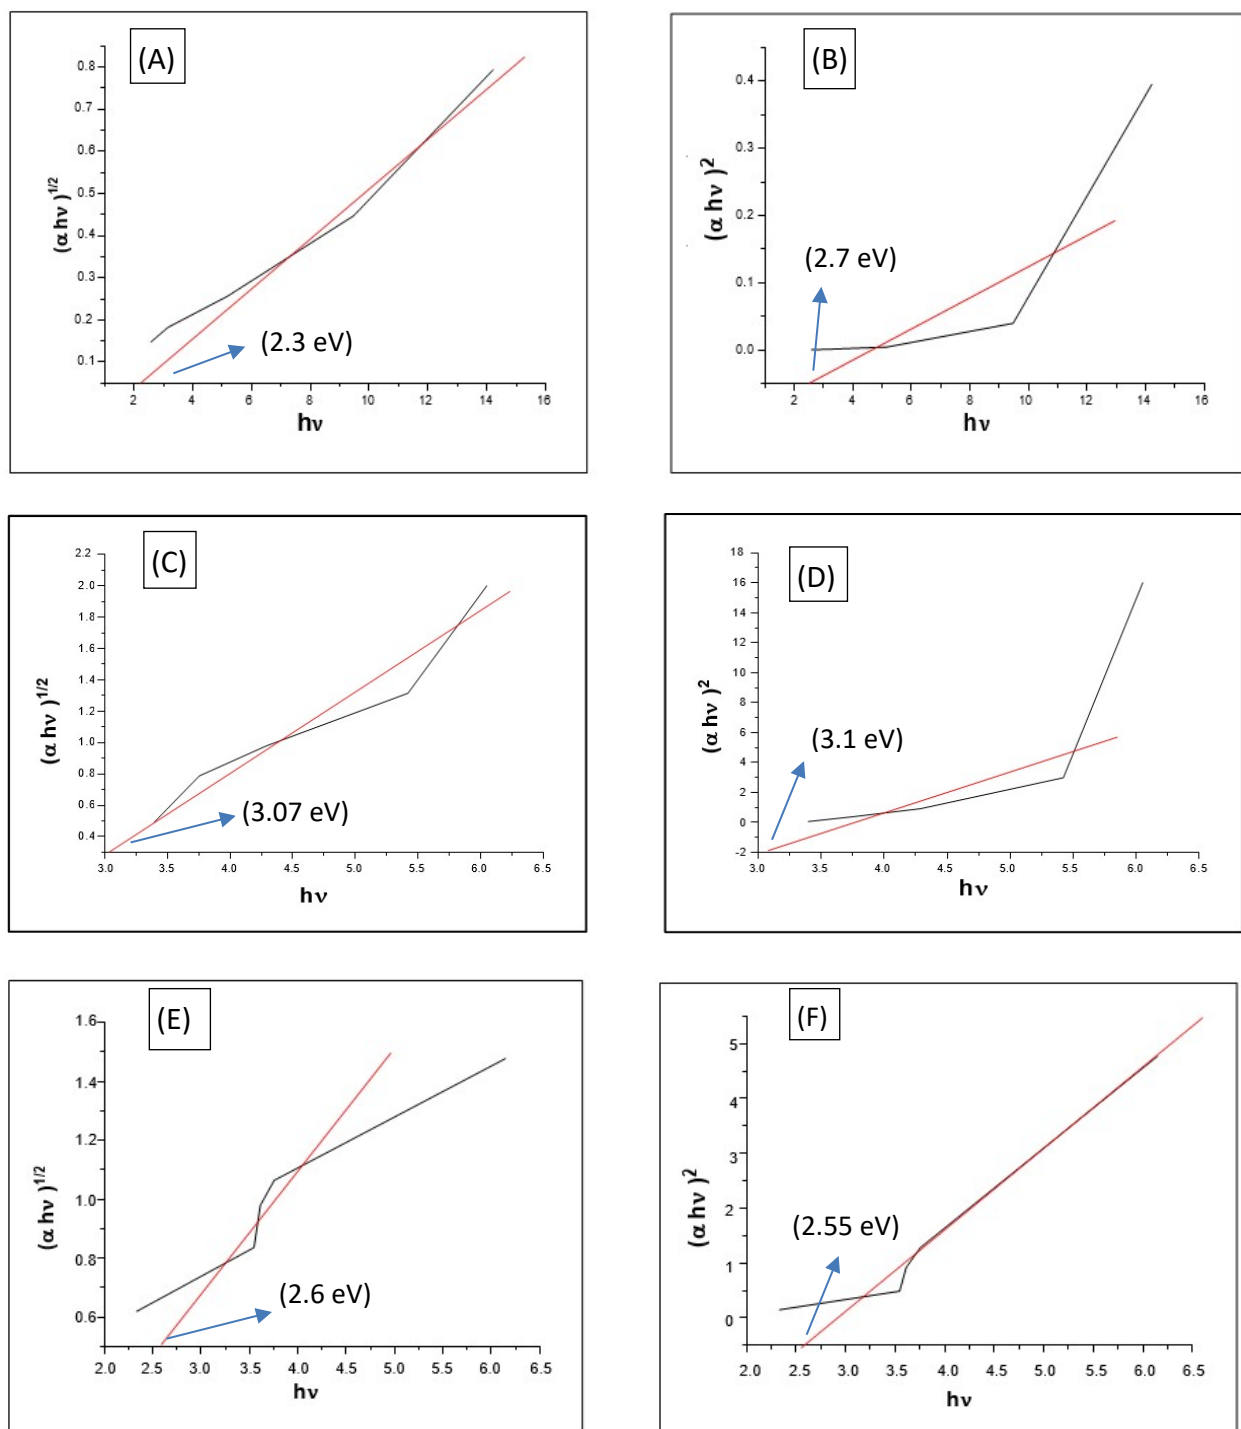

**Fig. S2 (ESI).** Direct and indirect optical band gap ( $E_g$ ) of Co<sub>3</sub>O<sub>4</sub> QDs (A and B), PPy (C and D) and Co<sub>3</sub>O<sub>4</sub>@PPy NCs (E and F).
