# Supplementary material for: Co3O4 quantum dot decorated polypyrrole nanocomposites as a flexible, conducting, anticorrosive and antibacterial agent: sustainable experimental and theoretical approach
Source: Royal Society of Chemistry journal article supplement (doi:10.1039/d2su00104g), 2023-01-01
Supplement: d2su00104g6.pdf [file d2su00104g6.pdf]

**Table S1.** Mulliken charges and Mulliken charges summed into Heavy atoms (SUHA) of  $\text{Co}_3\text{O}_4@\text{PPy}$  NCs by frequency calculation study of Gaussian09.

| <b>S. No.<br/>of atom</b> | <b>Element</b> | <b>Mulliken charge</b> | <b>H summed into Heavy Atoms (SUHA)</b> |
|---------------------------|----------------|------------------------|-----------------------------------------|
| 1                         | C              | -0.140672              | -0.028447                               |
| 2                         | C              | -0.136852              | -0.041927                               |
| 3                         | C              | 0.237055               | 0.237055                                |
| 4                         | C              | 0.302540               | 0.302540                                |
| 5                         | N              | -0.645074              | -0.378814                               |
| 6                         | C              | -0.090405              | -0.090405                               |
| 7                         | C              | 0.302533               | 0.302533                                |
| 8                         | C              | -0.136849              | -0.041924                               |
| 9                         | C              | -0.140673              | -0.028450                               |
| 10                        | C              | 0.237052               | 0.237052                                |
| 11                        | N              | -0.645068              | -0.378808                               |
| 12                        | C              | -0.090405              | -0.090405                               |
| 13                        | H              | 0.112224               | SUHA                                    |
| 14                        | H              | 0.094925               | SUHA                                    |
| 15                        | H              | 0.112223               | SUHA                                    |
| 16                        | H              | 0.094925               | SUHA                                    |
| 17                        | H              | 0.266261               | SUHA                                    |
| 18                        | H              | 0.266260               | SUHA                                    |
