# Supplementary material for: Co3O4 quantum dot decorated polypyrrole nanocomposites as a flexible, conducting, anticorrosive and antibacterial agent: sustainable experimental and theoretical approach
Source: Royal Society of Chemistry journal article supplement (doi:10.1039/d2su00104g), 2023-01-01
Supplement: d2su00104g7.pdf [file d2su00104g7.pdf]

**Table S2.** Alpha occupied and virtual eigenvalues molecular orbitals coefficients of  $\text{Co}_3\text{O}_4@\text{PANI}$  NCs, standard basis set B3LYP function 6-31G(d) (6D, 7F).

| Molecular Orbitals Coefficients                 | 1         | 2         | 3         | 4         | 5         |
|-------------------------------------------------|-----------|-----------|-----------|-----------|-----------|
| <b><math>\alpha</math>-Occupied eigenvalues</b> | -14.32812 | -14.32812 | -10.20941 | -10.20940 | -10.17466 |
|                                                 | -10.17465 | -10.17410 | -10.17410 | -0.90668  | -0.89774  |
|                                                 | -0.80948  | -0.73249  | -0.69872  | -0.60804  | -0.58221  |
|                                                 | -0.51189  | -0.51161  | -0.48197  | -0.47121  | -0.42563  |
|                                                 | -0.40929  | -0.40013  | -0.37587  | -0.37354  | -0.33048  |
| <b><math>\alpha</math>-Virtual eigenvalues</b>  | -0.32513  | -0.25726  | -0.23748  | -0.17066  |           |
|                                                 | 6         | 7         | 8         | 9         | 10        |
|                                                 | 0.01074   | 0.03880   | 0.08780   | 0.08908   | 0.11430   |
|                                                 | 0.12220   | 0.14704   | 0.18083   | 0.18171   | 0.18681   |
|                                                 | 0.20379   | 0.25445   | 0.30014   | 0.34563   | 0.34747   |
|                                                 | 0.35061   | 0.37271   | 0.50021   | 0.53499   | 0.55337   |
|                                                 | 0.55775   | 0.56127   | 0.59430   | 0.60627   | 0.61143   |
|                                                 | 0.61309   | 0.62479   | 0.63963   | 0.65042   | 0.67126   |
|                                                 | 0.69364   | 0.71857   | 0.72240   | 0.78485   | 0.79040   |
|                                                 | 0.84096   | 0.84354   | 0.85389   | 0.87076   | 0.89535   |
|                                                 | 0.89745   | 0.90901   | 0.91581   | 0.92815   | 0.93289   |
|                                                 | 0.99572   | 1.00209   | 1.03030   | 1.03056   | 1.04276   |
|                                                 | 1.06882   | 1.18096   | 1.20498   | 1.20528   | 1.26099   |
|                                                 | 1.27787   | 1.36243   | 1.42075   | 1.46176   | 1.46577   |
|                                                 | 1.49249   | 1.53027   | 1.54856   | 1.55577   | 1.76815   |
|                                                 | 1.78424   | 1.84053   | 1.84513   | 1.90312   | 1.90560   |
|                                                 | 1.92209   | 1.97620   | 1.99227   | 1.99810   | 2.06165   |
|                                                 | 2.07076   | 2.14177   | 2.14380   | 2.15253   | 2.19695   |
|                                                 | 2.23276   | 2.26583   | 2.32725   | 2.40982   | 2.43235   |
|                                                 | 2.44261   | 2.50097   | 2.50862   | 2.53357   | 2.60758   |
| 2.62652                                         | 2.69164   | 2.74836   | 2.83130   | 2.85219   |           |
| 2.89215                                         | 2.92463   | 3.12564   | 3.42906   | 3.82926   |           |
| 3.86556                                         | 4.09997   | 4.12816   | 4.15974   | 4.34264   |           |
| 4.40302                                         | 4.72957   |           |           |           |           |
