# Supplementary figures and images for: Co3O4 quantum dot decorated polypyrrole nanocomposites as a flexible, conducting, anticorrosive and antibacterial agent: sustainable experimental and theoretical approach
Source: Royal Society of Chemistry journal article supplement (doi:10.1039/d2su00104g), 2023-01-01

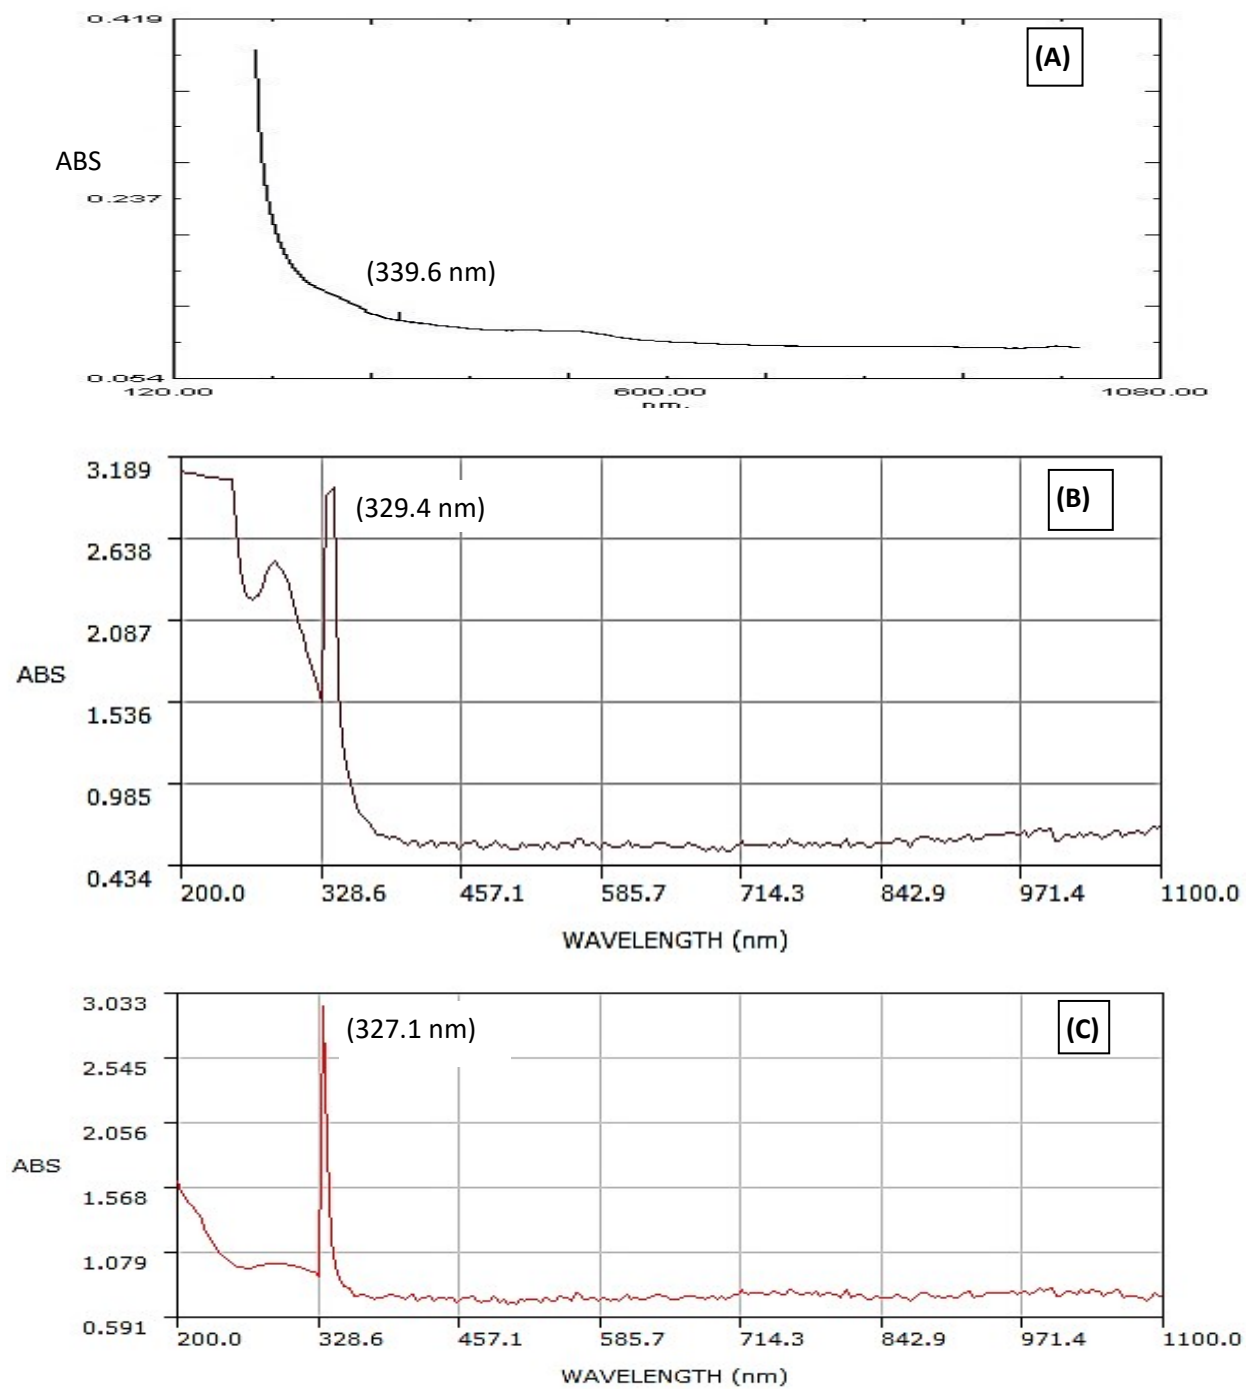

**Fig. S1.** UV-visible absorption spectra of  $\text{Co}_3\text{O}_4$  QDs (A), PPy (B) and  $\text{Co}_3\text{O}_4@$ PPy NCs (C).

Supplement: d2su00104g1.pdf [file d2su00104g1.pdf]

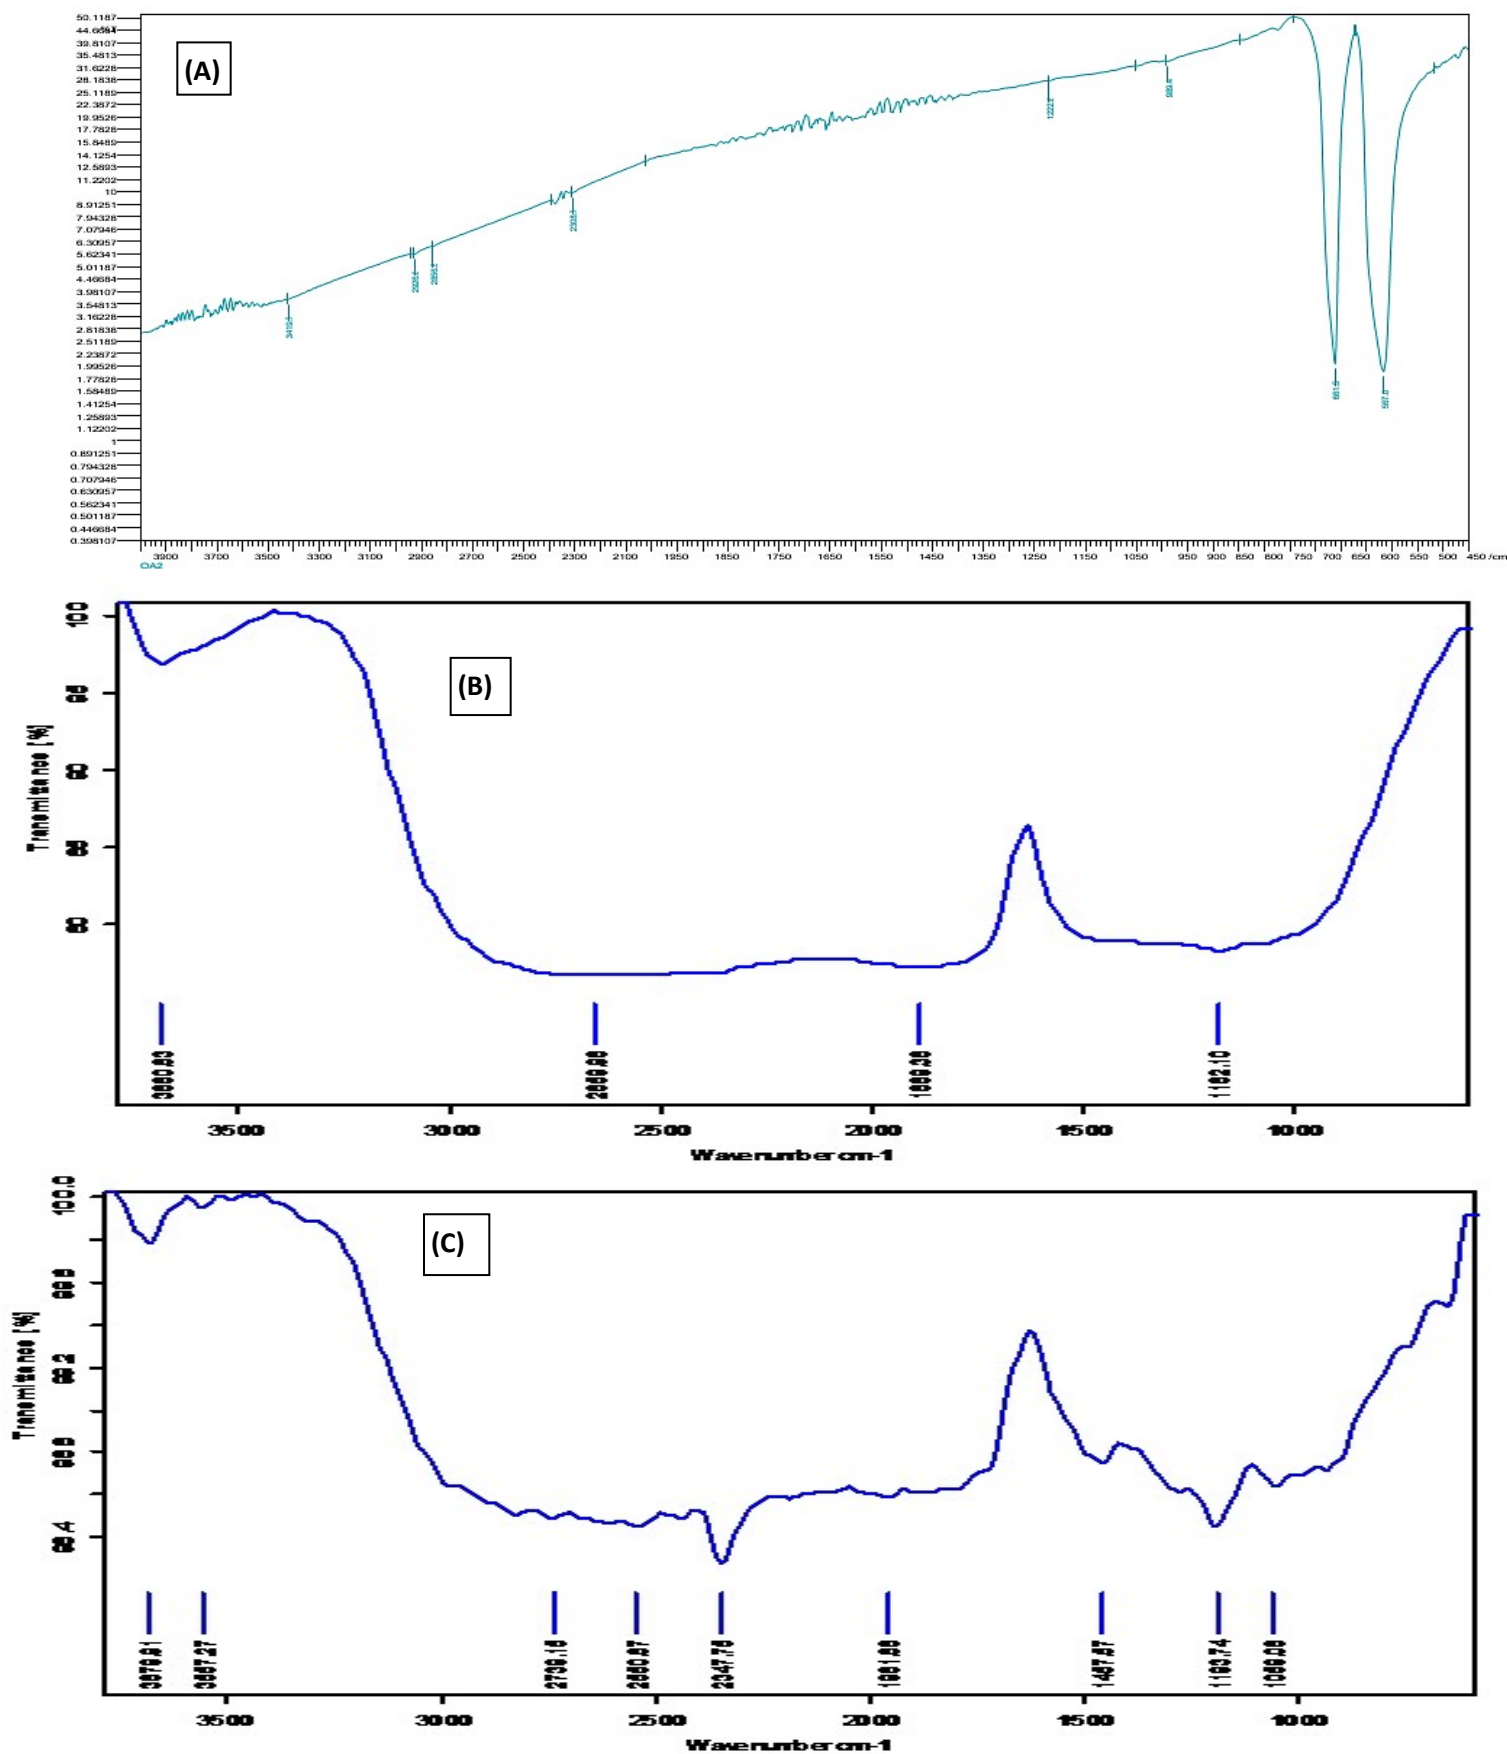

Fig. S3. FTIR spectra of Co<sub>3</sub>O<sub>4</sub> QDs (A), PPy (B), and Co<sub>3</sub>O<sub>4</sub>@PPy NCs (C).

Supplement: d2su00104g3.pdf [file d2su00104g3.pdf]

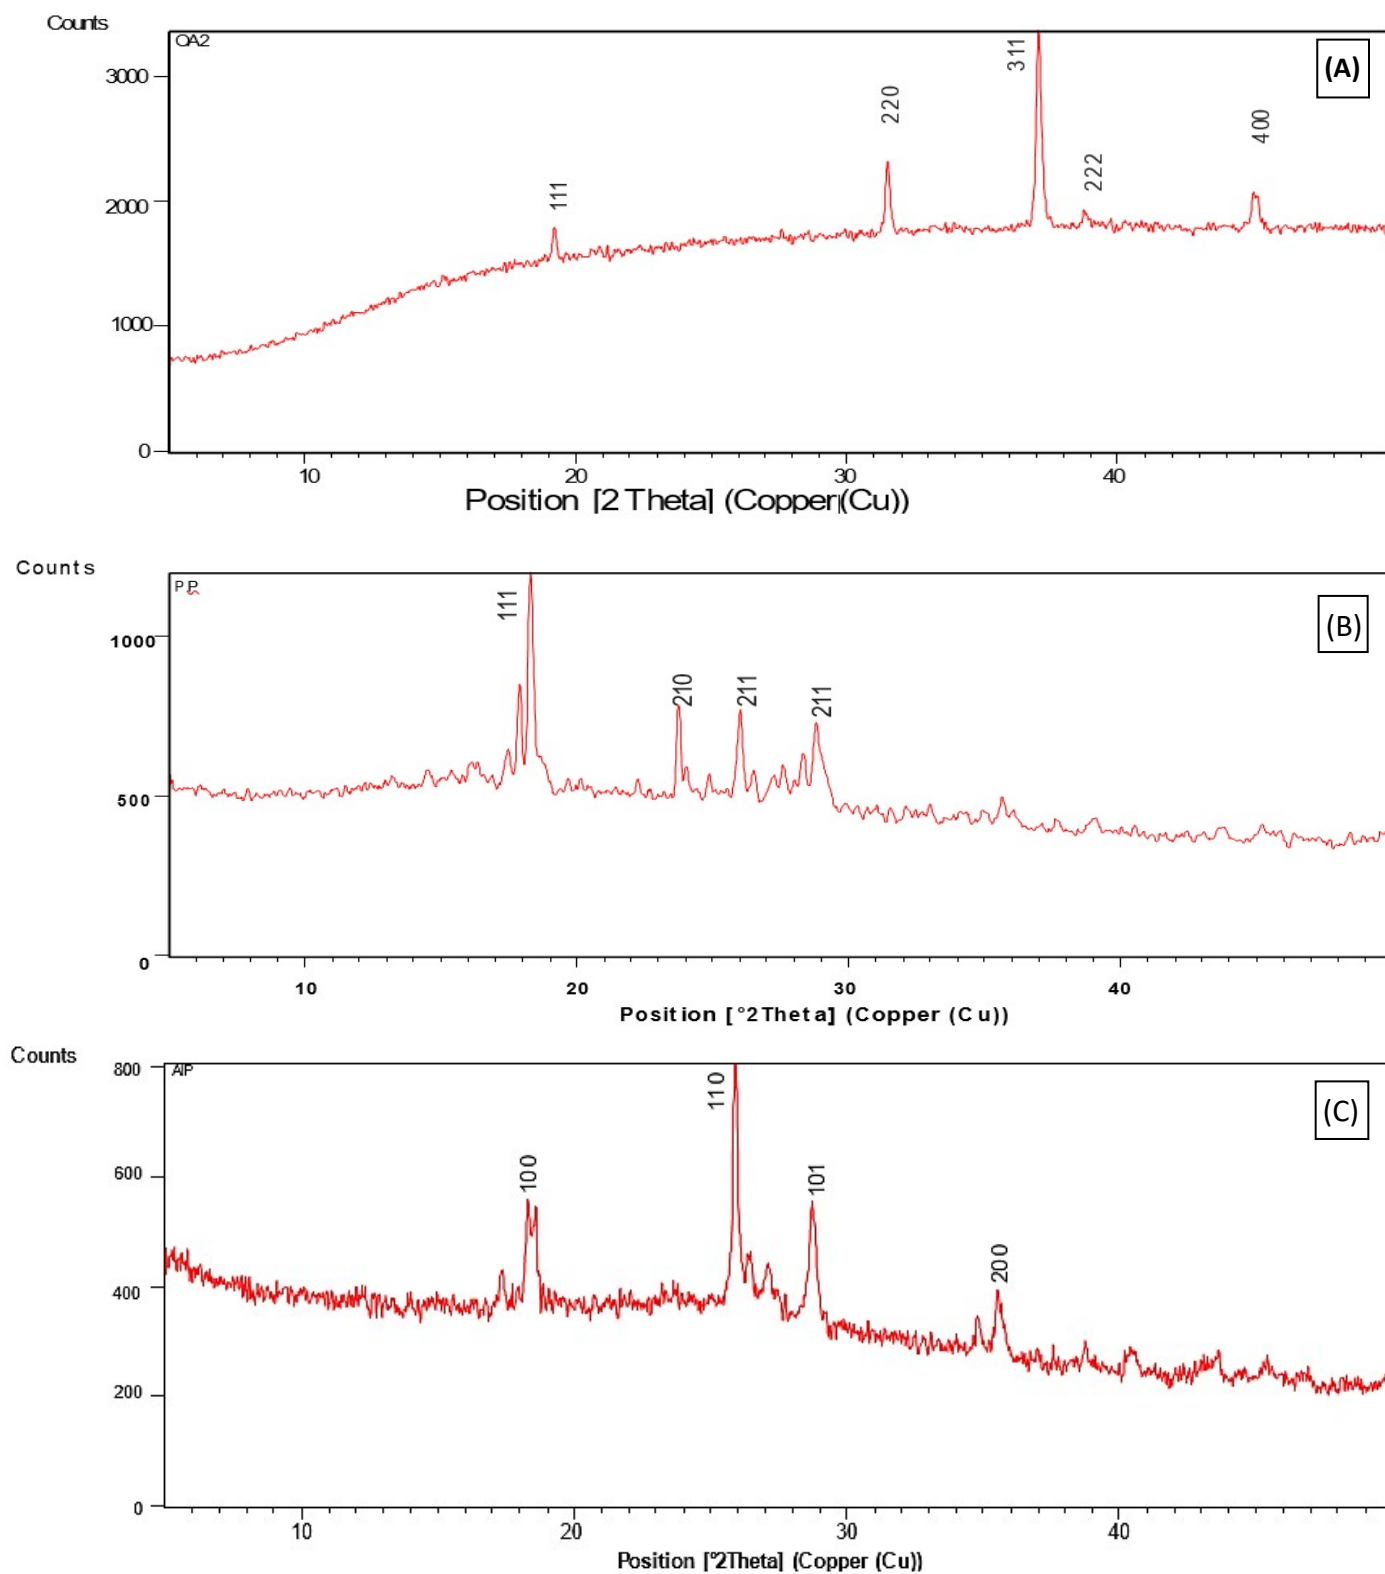

**Fig. S4.** Powder XRD of Co<sub>3</sub>O<sub>4</sub> QDs (A), PPy (B), and Co<sub>3</sub>O<sub>4</sub>@PPy NCs (C).

Supplement: d2su00104g4.pdf [file d2su00104g4.pdf]

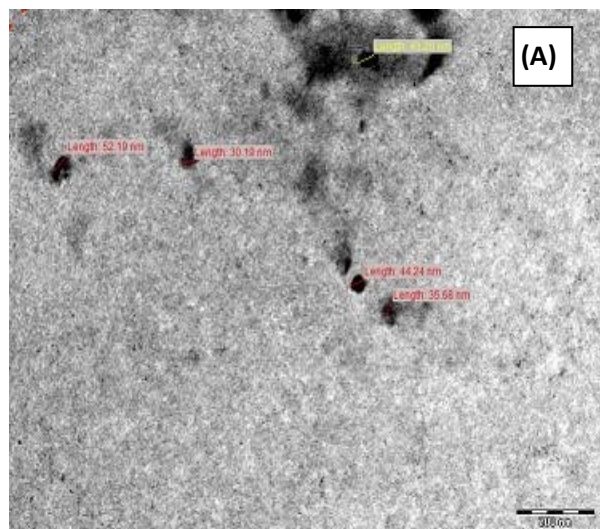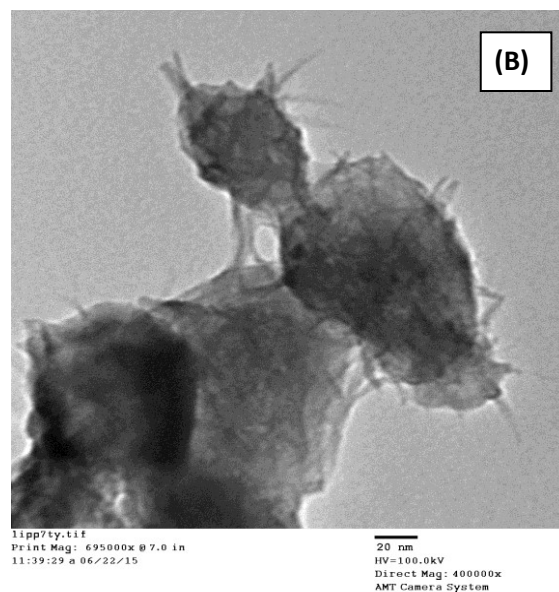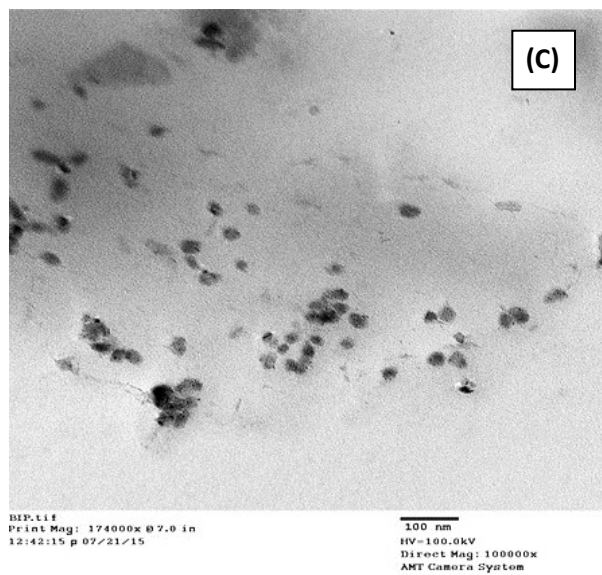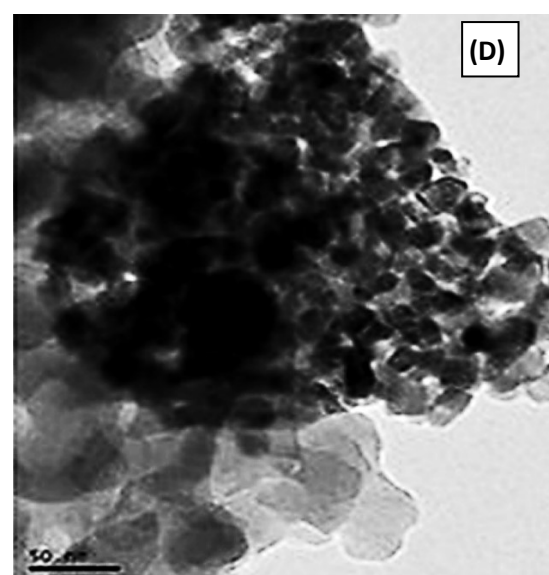

**Fig. S5 (ESI).** TEM images of Co<sub>3</sub>O<sub>4</sub> QDs (A), PPy CPs (B), and Co<sub>3</sub>O<sub>4</sub>@PPy NCs (C and D).

Supplement: d2su00104g5.pdf [file d2su00104g5.pdf]
